# Supplementary material for: Response to ERBB3-Directed Targeted Therapy in NRG1 -Rearranged Cancers
Source: Oxford University Press journal article supplement (doi:10.1158/2159-8290.cd-17-1004), 2018-04-02
Supplement: 21598290cd171004-sup-188968_2_supp_4647988_p62flc.docx [file 21598290cd171004-sup-188968_2_supp_4647988_p62flc.docx]

**Figure S1. *NRG1* is overexpressed in HCC-95 and MDA-MB-175-VII cells. A**. Targeted RNA sequencing (MSK-Solid Fusion Assay) was used to profile MDA-MB-175-VII and HCC-95 cell lines for fusions. No fusion was detected in HCC-95 whereas a *DOC4-NRG1* fusion was identified in MDA-MB-175-VII. **B.**Gene expression microarray data (Illumina HumanWG-6 v2.0) for 67 NSCLC cell lines was downloaded from the Gene Expression Omnibus (GEO, Accession number Series GSE32989). Log2 intensity values for *NRG1* were subsequently normalized across all cell lines, plotted using Graphpad Prism software across the panel of cell lines, and ranked from highest (top) to lowest (bottom) expression. HCC-95 (red bar) has the highest level of *NRG1* mRNA. **C**. MDA-MB-175-VII cells were left untreated or treated with 0.25 µM afatinib for 1 hour and then receptor tyrosine kinase (RTK) arrays were used to profile cell extracts for activated RTKs.

**Figure S2. Effects on in vitro cell growth and ERBB3 pathway signaling in cell lines treated with afatinib.** **A**. Cells were treated with DMSO or afatinib (0.5 µM) for one hour prior to the addition of heregulin (HRGB1) for 30 minutes. Whole-cell extracts were then prepared and subjected to Western blotting for the proteins shown in the representative immunoblots. Similar results were obtained in two independent experiments. **B**. Cell lines were treated with 0.5 µM afatinib or vehicle and assessed for time course viability determined by the Alamar blue assay at the indicated time points. Results represent the mean ± SD of triplicates for each time point.

**Figure S3. In vitro dose response curves of HCC-95 and MDA-MB-175-VII cell treated with various compounds.**  HCC-95 (top) and MDA-MB-175-VII (bottom) cells were treated with the indicated concentrations of afatinib, neratinib or erlotinib for 96 hours and then assessed for cell viability. Results represent the mean ± SD of two experiments in which each condition was assayed in triplicate. IC50 values from curve fitting are shown.

**Figure S4. shRNA-mediated depletion of *ERBBs*.** MDA-MB-175-VII cells were infected with lentiviruses carrying non-targeting shRNAs (NT-sh) or shRNAs targeting *EGFR*, *ERBB2* or *ERBB3*. shRNA-expressing cells were selected with 5 µg/mL puromycin for 48 hours, then the respective mRNA level was assessed by quantitative PCR using Taqman assays. Experiments were conducted in duplicate.

**Figure S5. In vivo growth inhibition elicited by afatinib and GSK2849330 in a *CLU-NRG1*-rearranged patient-derived xenograft (PDX) mouse model.** Female BALB/c nude mice were subcutaneously implanted with *CLU-NRG1*-rearranged tumors and treated with afatinib at 15 mg/kg daily for 28 days, resulting in a significant inhibition of tumor growth compared to the vehicle arm (n=6, top left). The same PDX mouse model was treated with the anti-ERBB3 monoclonal antibody, GSK2849330 at 25 mg/kg biweekly for 35 days, resulting in a dramatic and durable response of complete tumor regression compared to vehicle- or IgG-treated controls (n=10, bottom left). The body weight changes in each of the treatment groups are shown (afatinib – upper right, GSK2849330 – lower right). **B.** These mice were monitored after cessation of treatment on day 35 for another 35 days post the last dose of GSK284930 and exhibited sustained tumor regression (left). Body weight changes are shown (right).

**Figure S1. *NRG1* is overexpressed in HCC-95 and MDA-MB-175-VII cells.**

**Figure S2. Effects on in vitro cell growth and ERBB3 pathway signaling in cell lines treated with afatinib.**

**Figure S3. In vitro dose response curves of HCC-95 and MDA-MB-175-VII cell treated with various compounds.**

**Figure S4. shRNA-mediated depletion of ERBBs**

**Figure S5. In vivo growth inhibition elicited by afatinib and GSK2849330 in a *CLU-NRG1*-rearranged patient-derived xenograft (PDX) mouse model.**
